# Supplementary material for: Favorable Cardiovascular Health at Young and Middle Ages and Dementia in Older Age—The CHA Study
Source: PubMed Central journal article supplement — J Am Heart Assoc. 2018 Dec 28;8(1):e009730. doi: 10.1161/JAHA.118.009730 (PMC6405697; doi:10.1161/jaha.118.009730), 2018-12-28
Supplement: JAH3-8-e009730-s001.pdf [file JAH3-8-e009730-s001.pdf]

# **SUPPLEMENTAL MATERIAL**

**Table S1. Definitions of Favorable, Elevated and High Levels of Cardiovascular Health Factors.**

| <b>Definitions of Favorable, Elevated and High Levels of CV Health Factors</b> |                |                 |                                   |                                                               |                                                                                                |
|--------------------------------------------------------------------------------|----------------|-----------------|-----------------------------------|---------------------------------------------------------------|------------------------------------------------------------------------------------------------|
|                                                                                | <b>Smoking</b> | <b>Diabetes</b> | <b>BMI<br/>(kg/m<sup>2</sup>)</b> | <b>Blood Pressure<br/>(mm Hg )</b>                            | <b>Total Serum Cholesterol<br/>(mmol/L)<sup>§</sup></b>                                        |
| <b>Low-Risk<br/>(Favorable)</b>                                                | Non-smoker     | No diabetes     | < 25                              | Untreated<br>SBP/DBP ≤ 120/80                                 | Untreated cholesterol < 5.18 mmol/L<br>or 200 mg/dl*                                           |
| <b>Moderate-Risk<br/>(Elevated)</b>                                            | -              | -               | 25.0-29.9                         | Untreated SBP/DBP<br>121-139/81-89                            | Untreated cholesterol 5.18-<br>6.21mmol/L or 200-239 mg/dl                                     |
| <b>High-Risk</b>                                                               | Smoker         | Diabetes        | ≥ 30                              | SBP/DBP ≥ 140/90 or<br>taking antihypertensive<br>medications | Cholesterol level ≥ 6.22 mmol/l or<br>240 mg/dl, or taking cholesterol-<br>lowering medication |

\*Divide by 0.0259 to convert to mg/dl

**Table S2. Hazard Ratios (95% Confidence Intervals) for Dementia\* by Baseline Individual Risk Factors (1967-73).**

| <b>Baseline Individual Risk Factors</b>                                 |                                     | <b>Model 1<sup>†</sup></b> | <b>Model 2<sup>‡</sup></b> |
|-------------------------------------------------------------------------|-------------------------------------|----------------------------|----------------------------|
| <i>Smoking Status</i>                                                   | Not smokers                         | <b>0.88 (0.78-0.99)</b>    | 0.99 (0.88-1.12)           |
|                                                                         | Ever smokers                        | <b>0.82 (0.71-0.93)</b>    | 0.92 (0.80-1.05)           |
|                                                                         | Current smokers                     | <b>1.00</b>                | 1.00                       |
| <i>BMI(kg/m<sup>2</sup>)</i>                                            | < 25                                | 0.92 (0.77-1.09)           | 0.99 (0.83-1.17)           |
|                                                                         | ≥25 and <30                         | 0.89 (0.76-1.05)           | 0.94 (0.79-1.10)           |
|                                                                         | ≥30                                 | 1.00                       | 1.00                       |
| <i>BP Level/Med. Use</i>                                                | ≤120/80 mmHg, no meds               | <b>0.85 (0.75-0.98)</b>    | <b>0.87 (0.76-0.99)</b>    |
|                                                                         | >120/80, ≤140/90, no meds           | 0.89 (0.79-1.02)           | 0.94 (0.83-1.07)           |
|                                                                         | ≥ 140/90 or on meds                 | 1.00                       | 1.00                       |
| <i>Cholesterol Level/Meds Use: &lt;5.18 mmol/l<sup>§</sup>, no meds</i> | <5.18 mmol/l <sup>§</sup> , no meds | 0.86 (0.74-1.01)           | 0.86 (0.74-1.00)           |
|                                                                         | ≥5.18 and <6.22, no meds            | 0.96 (0.82-1.12)           | 0.95 (0.80-1.11)           |
|                                                                         | ≥6.22 or on meds                    | 1.00                       | 1.00                       |
| <i>Diabetes</i>                                                         |                                     | 1.32 (0.90-1.95)           | 1.21 (0.82-1.80)           |

\*Dementia were defined as any dementia-related diagnoses with ICD-9: 290, 290.0–4, 290.8–9, 294.1, 331, 331.0–2, 331.9. Medicare claims during 1991-2010 [including fee-for-service, for inpatient, outpatient (institutional and non-institutional), skilled nursing, durable medical equipment, home health, and hospice claims].

† Model 1: Adjusted for baseline age, sex, race, education attainment, and annual number of medical care visits prior to dementia diagnosis. Deaths prior to dementia were treated as censored observations.

‡Model 2: Adjusted for baseline age, sex, race, education attainment, and annual number of medical care visits prior to dementia diagnosis, taking into account the impact of deaths prior to dementia diagnosis on the association of interest.

§Divide by 0.0259 to convert to mg/dl

**Table S3. Hazard Ratios (95% Confidence Intervals) for Dementia# Age 65 During 1991-2010 by Baseline CVH Status (1967-73), Stratified by Sex.**

|                              | Baseline CVH Status     |                             |                                       |                                    |              |
|------------------------------|-------------------------|-----------------------------|---------------------------------------|------------------------------------|--------------|
|                              | Favorable*<br>(n=742)   | Moderate Risk†<br>(n=2,238) | 1-Only High-Risk<br>Factor‡ (n=4,220) | 2+ High-Risk<br>Factors‡ (n=2,919) | P-Trend**    |
| <b>MEN</b>                   |                         |                             |                                       |                                    |              |
| <b>Model 1</b> <sup>§</sup>  | <b>0.62 (0.40-0.97)</b> | <b>0.80 (0.67-0.96)</b>     | <b>0.83 (0.71-0.97)</b>               | <b>1.0</b>                         | <b>0.002</b> |
| <b>Model 2</b> <sup>  </sup> | 0.69 (0.45-1.07)        | 0.92 (0.76-1.10)            | 0.89 (0.76-1.03)                      | <b>1.0</b>                         | <b>0.096</b> |
| <b>WOMEN</b>                 |                         |                             |                                       |                                    |              |
| <b>Model 1</b> <sup>§</sup>  | <b>0.68 (0.49-0.94)</b> | <b>0.63 (0.49-0.82)</b>     | <b>0.74 (0.60-0.92)</b>               | <b>1.0</b>                         | <b>0.001</b> |
| <b>Model 2</b> <sup>  </sup> | 0.78 (0.56-1.09)        | <b>0.73 (0.57-0.94)</b>     | 0.83 (0.67-1.03)                      | <b>1.0</b>                         | <b>0.037</b> |

\*Ideal levels of all major CVD RFs (SBP/DBP  $\leq$ 120/ $\leq$ 80 mmHg and no antihypertensive medication, serum total cholesterol <5.18 mmol/L and no cholesterol-lowering medication, not smoking, BMI < 25 kg/m<sup>2</sup>, and no diabetes).

†Borderline levels of SBP/DBP or serum total cholesterol, not smoking, BMI 25.0-29.9 kg/m<sup>2</sup>, and no diabetes

‡ High-risk factors: hypertension (SBP/DBP  $\geq$  140/90) or using antihypertensive medication), hypercholesterolemia (serum total cholesterol  $\geq$  6.22 mmol/L or using lipid-lowering medication), smoking, BMI  $\geq$ 30.0 kg/m<sup>2</sup>, diabetes.

§Model 1: Adjusted for baseline age, race, education attainment, and average number of claims per years prior to dementia diagnosis.

||Model 2: Adjusted for baseline age, race, education attainment, annual average number of claims prior to dementia diagnosis and death prior to dementia diagnoses.

#Dementia were defined as any dementia-related diagnoses with ICD-9: 290, 290.0–4, 290.8–9, 294.1, 331, 331.0–2, 331.9. Medicare claims during 1991-2010 [including fee-for-service, for inpatient, outpatient (institutional and non-institutional), skilled nursing, durable medical equipment, home health, and hospice claims].

\*\*P value for graded association across baseline risk factor groups with risk factor status as an ordinal variable.

**Table S4. Hazard Ratios (95% Confidence Intervals) for Dementia<sup>#</sup> After Age 65 During 1991-2010 by Baseline CVH Status (1967-73), Stratified by Education Levels.**

|                                              | Baseline CVH Status               |                                         |                                                   |                                                |                       |
|----------------------------------------------|-----------------------------------|-----------------------------------------|---------------------------------------------------|------------------------------------------------|-----------------------|
|                                              | Favorable <sup>*</sup><br>(n=742) | Moderate Risk <sup>†</sup><br>(n=2,238) | 1-Only High-Risk<br>Factor <sup>‡</sup> (n=4,220) | 2+ High-Risk<br>Factors <sup>‡</sup> (n=2,919) | P-Trend <sup>**</sup> |
| <b>&gt;12 years of schooling at baseline</b> |                                   |                                         |                                                   |                                                |                       |
| <b>Model 1<sup>§</sup></b>                   | <b>0.62 (0.43-0.90)</b>           | <b>0.72 (0.58-0.89)</b>                 | 0.84 (0.69-1.01)                                  | <b>1.0</b>                                     | <b>&lt;0.001</b>      |
| <b>Model 2<sup>  </sup></b>                  | <b>0.68 (0.47-0.99)</b>           | <b>0.79 (0.64-0.99)</b>                 | 0.89 (0.74-1.07)                                  | 1.0                                            | <b>0.011</b>          |
| <b>≤12 years of schooling at baseline</b>    |                                   |                                         |                                                   |                                                |                       |
| <b>Model 1<sup>§</sup></b>                   | 0.76 (0.54-1.08)                  | <b>0.76 (0.62-0.93)</b>                 | <b>0.78 (0.66-0.91)</b>                           | <b>1.0</b>                                     | <b>0.004</b>          |
| <b>Model 2<sup>  </sup></b>                  | <b>0.58 (0.36-0.94)</b>           | 0.79 (0.60-1.04)                        | 0.86 (0.68-1.10)                                  | <b>1.0</b>                                     | <b>0.016</b>          |

\*Ideal levels of all major CVD RFs (SBP/DBP ≤120/≤80 mmHg and no antihypertensive medication, serum total cholesterol <5.18 mmol/L and no cholesterol-lowering medication, not smoking, BMI < 25 kg/m<sup>2</sup>, and no diabetes).

<sup>†</sup>Borderline levels of SBP/DBP or serum total cholesterol, not smoking, BMI 25.0-29.9 kg/m<sup>2</sup>, and no diabetes

<sup>‡</sup> High-risk factors: hypertension (SBP/DBP ≥ 140/90) or using antihypertensive medication), hypercholesterolemia (serum total cholesterol ≥ 6.22 mmol/L or using lipid-lowering medication), smoking, BMI ≥30.0 kg/m<sup>2</sup>, diabetes.

<sup>§</sup>Model 1: Adjusted for baseline age, race, sex, and average number of claims per years prior to dementia diagnosis.

||Model 2: Adjusted for baseline age, race, sex, annual average number of claims prior to dementia diagnosis and death prior to dementia diagnoses.

#Dementia were defined as any dementia-related diagnoses with ICD-9: 290, 290.0–4, 290.8–9, 294.1, 331, 331.0–2, 331.9. Medicare claims during 1991-2010 [including fee-for-service, for inpatient, outpatient (institutional and non-institutional), skilled nursing, durable medical equipment, home health, and hospice claims].

\*\*P value for graded association across baseline risk factor groups with risk factor status as an ordinal variable.



**Table S5. Hazard Ratios (95% Confidence Intervals) for Dementia# After Age 65 During 1991-2010 by Baseline CVH Status (1967-73), Further Adjusted for Interim Stroke.**

|                             | Baseline CVH Status               |                                         |                                                   |                                                | P-Trend <sup>**</sup> |
|-----------------------------|-----------------------------------|-----------------------------------------|---------------------------------------------------|------------------------------------------------|-----------------------|
|                             | Favorable <sup>*</sup><br>(n=742) | Moderate Risk <sup>†</sup><br>(n=2,238) | 1-Only High-Risk<br>Factor <sup>‡</sup> (n=4,220) | 2+ High-Risk<br>Factors <sup>‡</sup> (n=2,919) |                       |
| <b>Model 1<sup>§</sup></b>  | <b>0.70 (0.54-0.90)</b>           | <b>0.75 (0.65-0.87)</b>                 | <b>0.81 (0.72-0.92)</b>                           | <b>1.0</b>                                     | <b>&lt;.001</b>       |
| <b>Model 2<sup>  </sup></b> | 0.79 (0.62-1.02)                  | <b>0.87 (0.77-1.00)</b>                 | <b>0.88 (0.78-0.99)</b>                           | <b>1.0</b>                                     | <b>0.020</b>          |

\*Ideal levels of all major CVD RFs (SBP/DBP  $\leq 120/\leq 80$  mmHg and no antihypertensive medication, serum total cholesterol  $< 5.18$  mmol/L and no cholesterol-lowering medication, not smoking, BMI  $< 25$  kg/m<sup>2</sup>, and no diabetes).

<sup>†</sup>Borderline levels of SBP/DBP or serum total cholesterol, not smoking, BMI 25.0-29.9 kg/m<sup>2</sup>, and no diabetes

<sup>‡</sup>High-risk factors: hypertension (SBP/DBP  $\geq 140/90$ ) or using antihypertensive medication), hypercholesterolemia (serum total cholesterol  $\geq 6.22$  mmol/L or using lipid-lowering medication), smoking, BMI  $\geq 30.0$  kg/m<sup>2</sup>, diabetes.

<sup>§</sup>Model 1: Adjusted for baseline age, sex, race, education attainment, average number of claims per years prior to dementia diagnosis, and any interim stroke occurring from age 65 to the time dementia was first diagnosed (or to the censored time).

||Model 2: Adjusted for baseline age, sex, race, education attainment, annual average number of claims prior to dementia diagnosis, and any interim stroke occurring from age 65 to the time dementia was first diagnosed (or to the censored time), and death prior to dementia diagnoses.

#Dementia were defined as any dementia-related diagnoses with ICD-9: 290, 290.0–4, 290.8–9, 294.1, 331, 331.0–2, 331.9. Medicare claims during 1991-2010 [including fee-for-service, for inpatient, outpatient (institutional and non-institutional), skilled nursing, durable medical equipment, home health, and hospice claims].

\*\*P value for graded association across 4 baseline risk factor groups with risk factor status as an ordinal variable.

Figure S1. Flow Chart Depicting CHA-MEDICARE\* Analysis Sample.

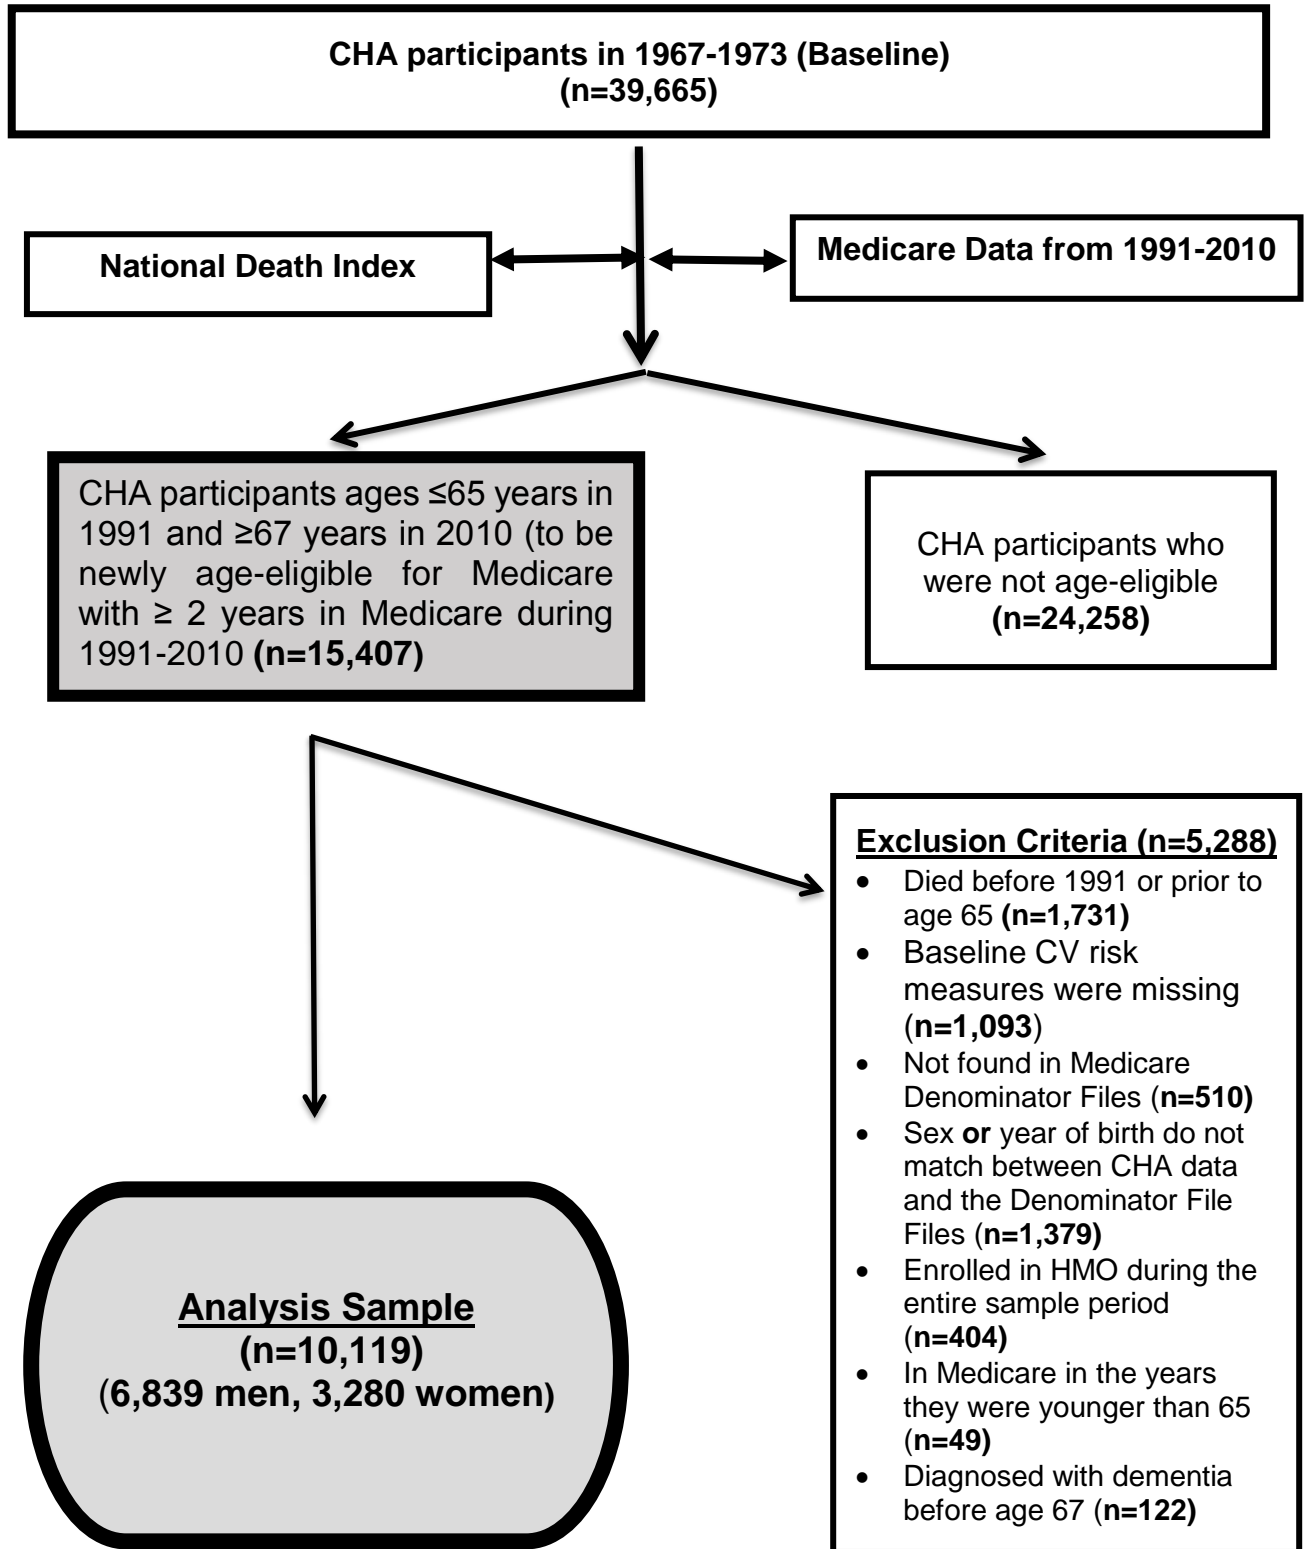

\*CHA, Chicago Heart Association Detection Project in Industry Study
